# Supplementary material
Source: PubMed Central journal article supplement (PMC9592526)

**Figure 3a**

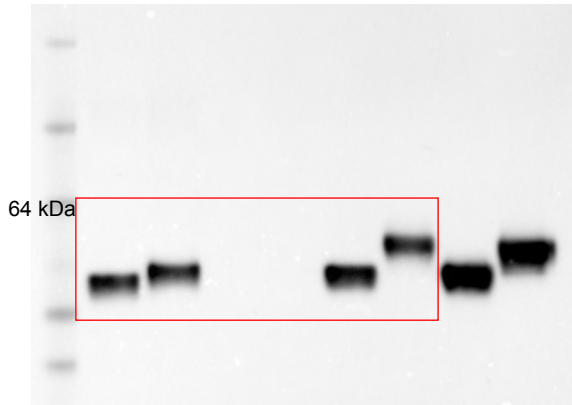

**Figure 3b**

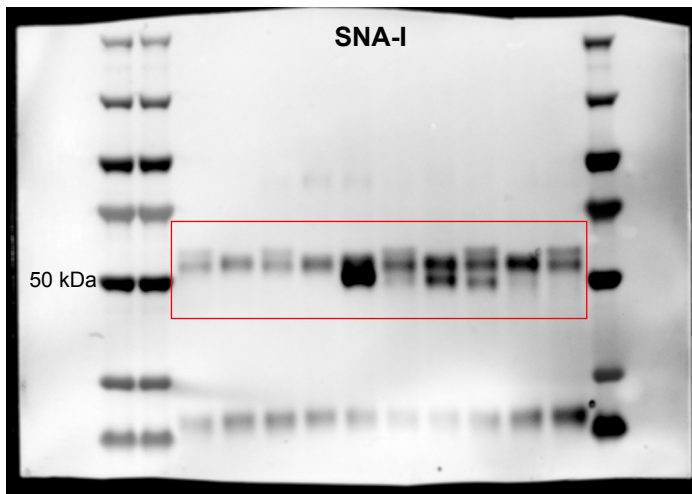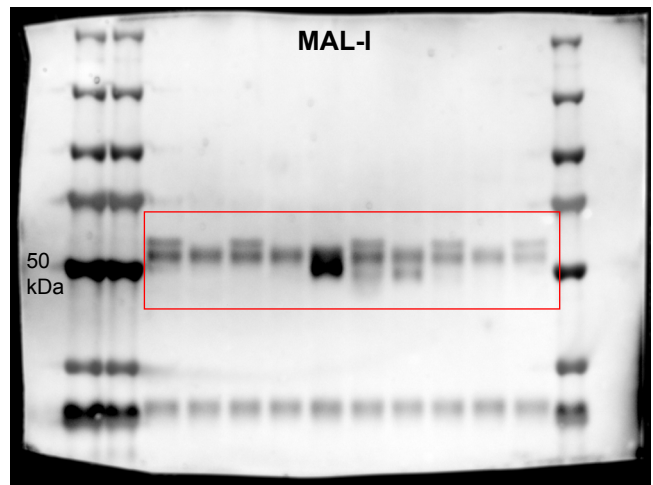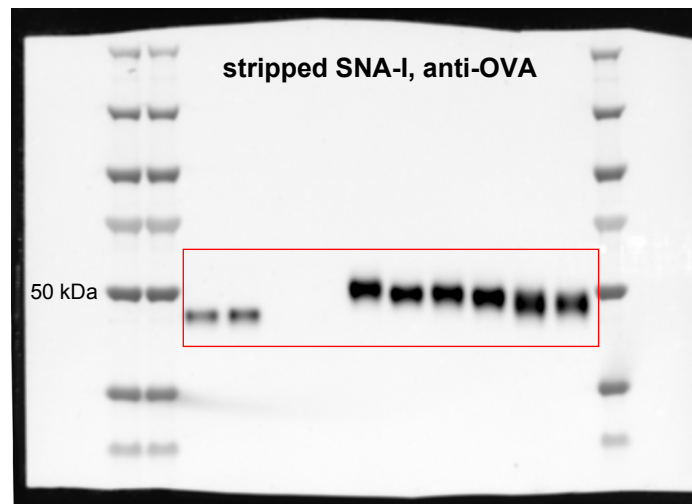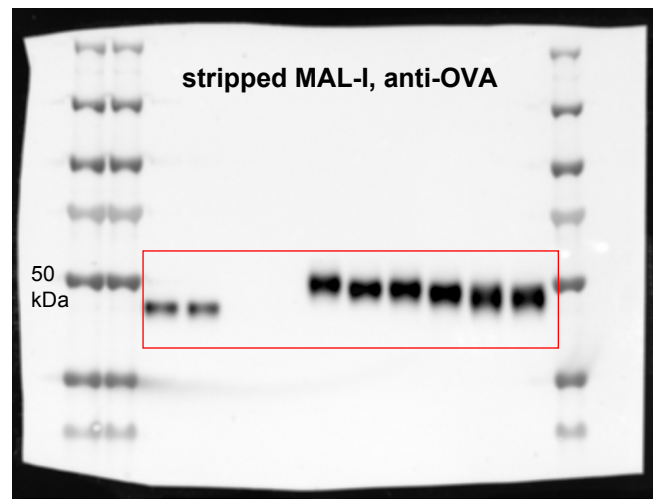

**Figure 3c**

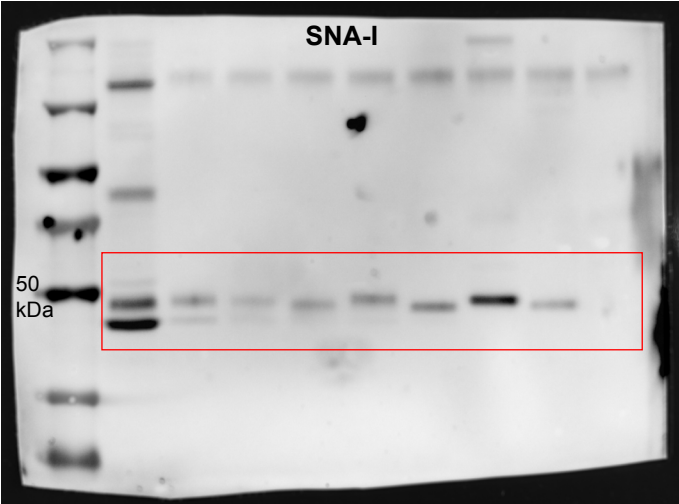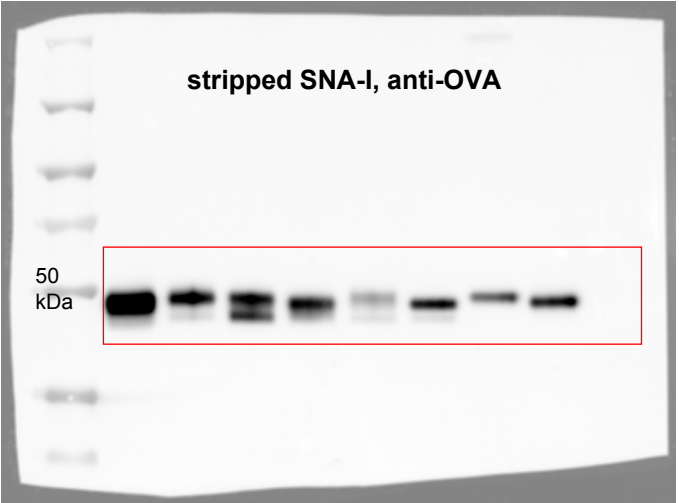

Extended Data Fig. 7a

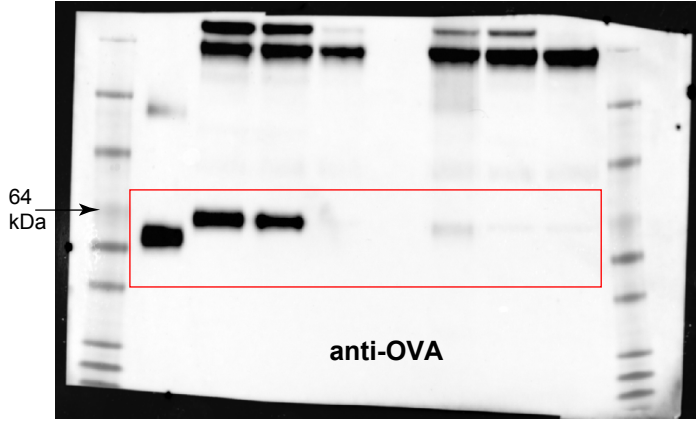

Extended Data Fig. 7b

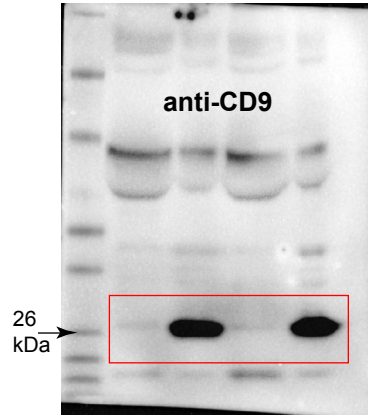

Extended Data Fig. 7c

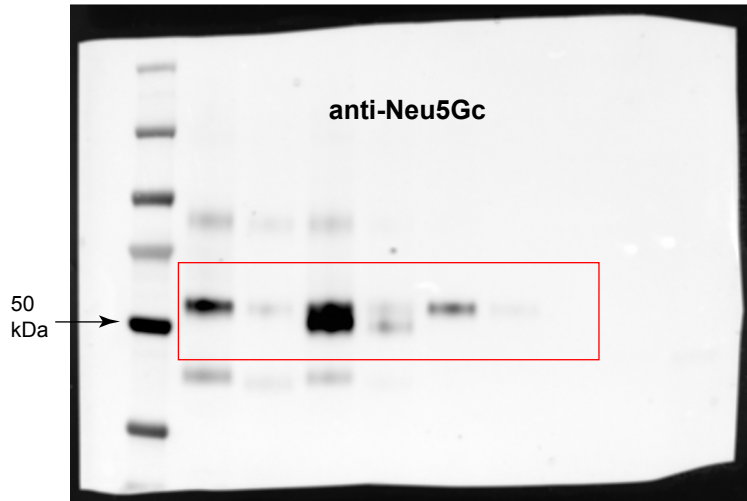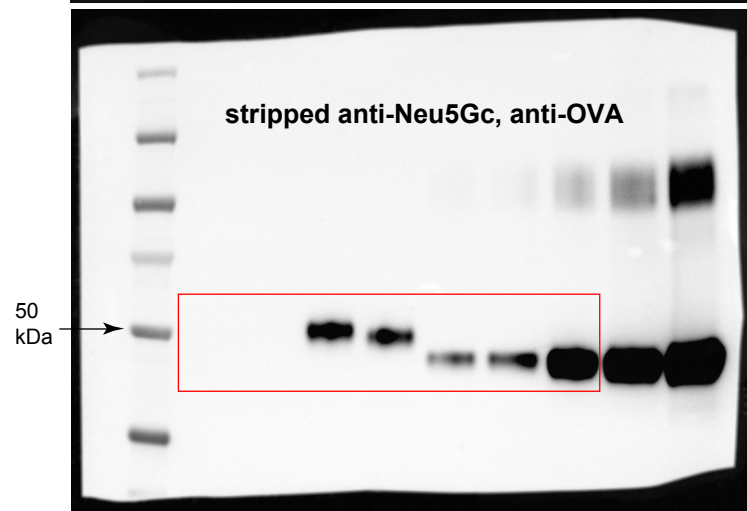

Extended Data Fig. 9d

Extended Data Fig. 9c

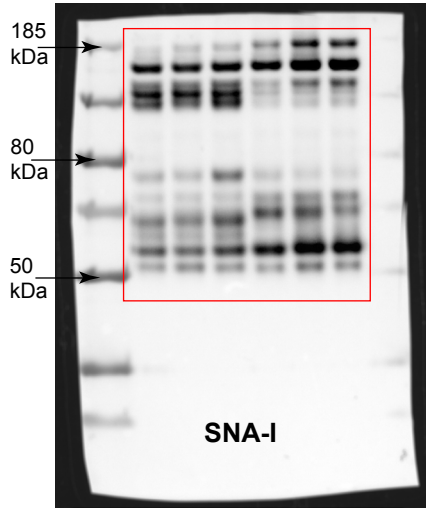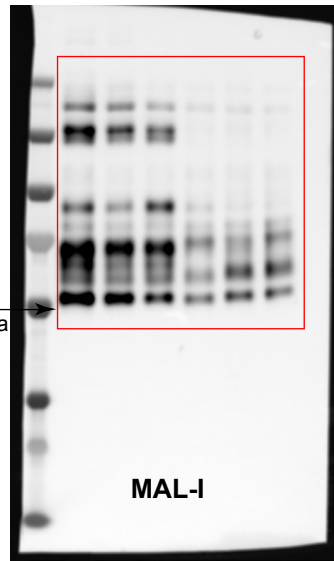

Extended Data Fig. 9e

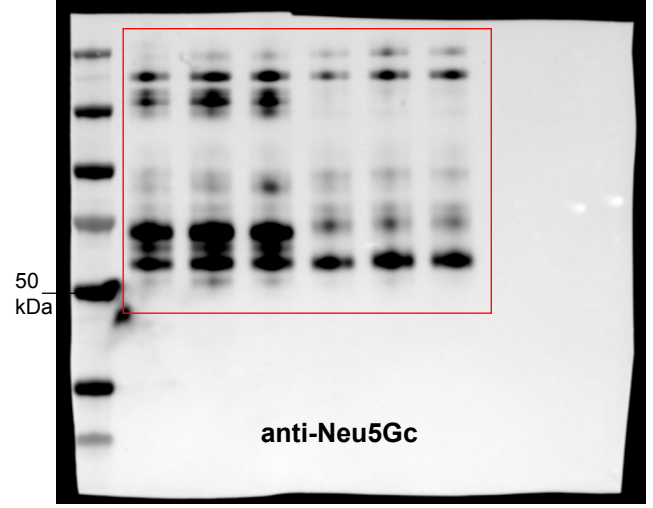

Extended Data Fig. 9f

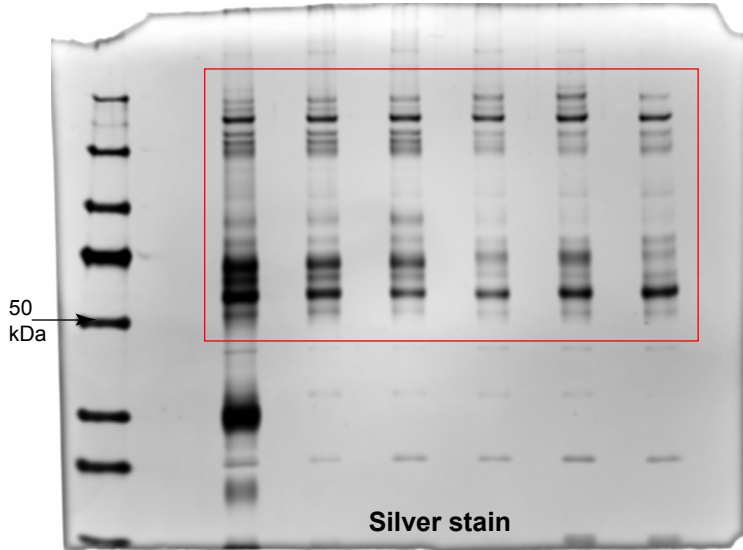

Extended Data Fig. 9g

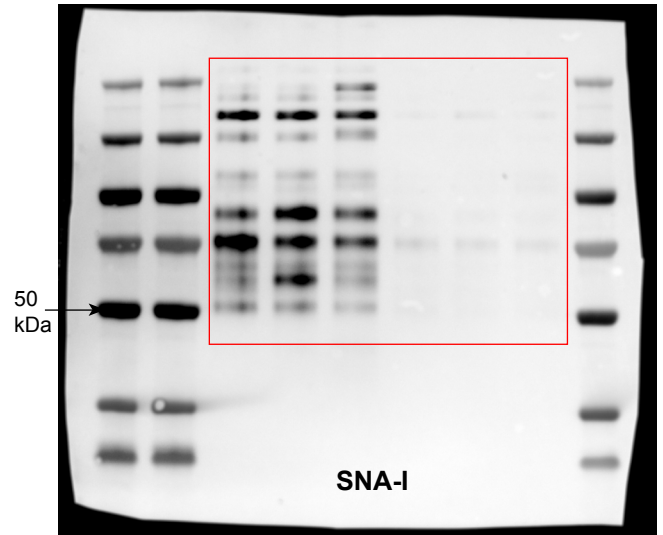

Extended Data Fig. 9h

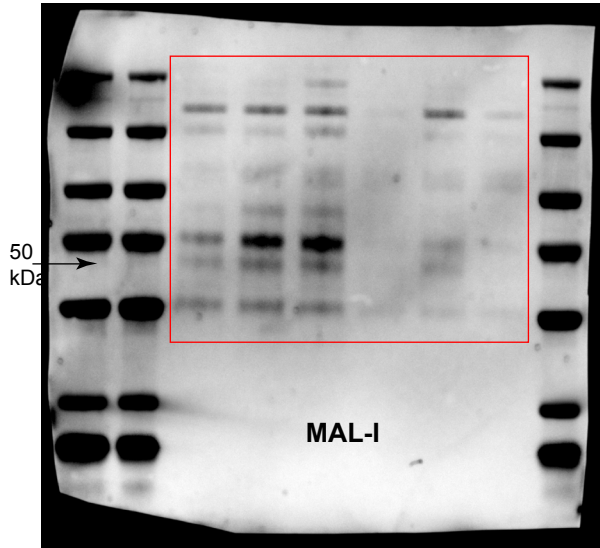

Extended Data Fig. 9i

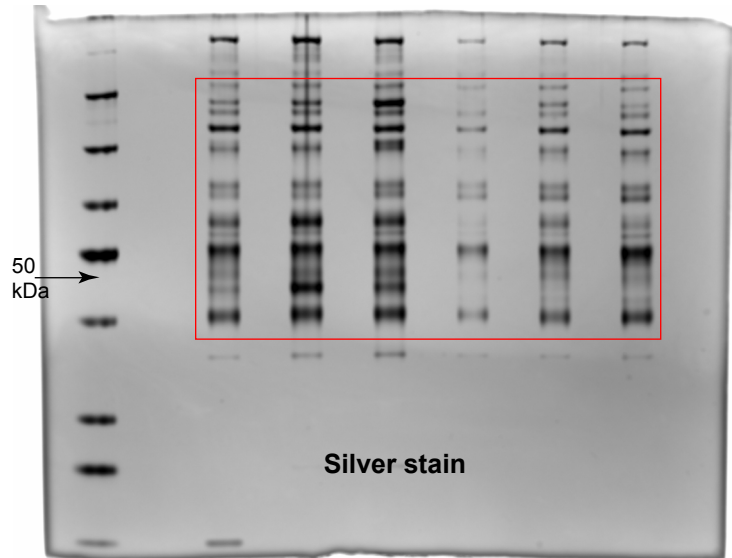

Extended Data Fig. 10c

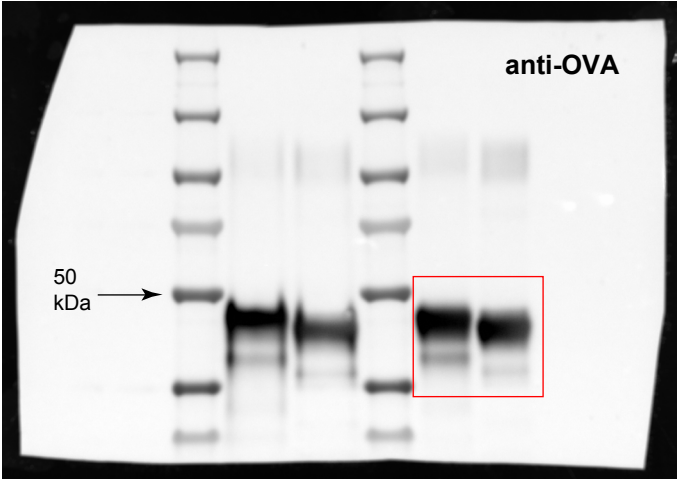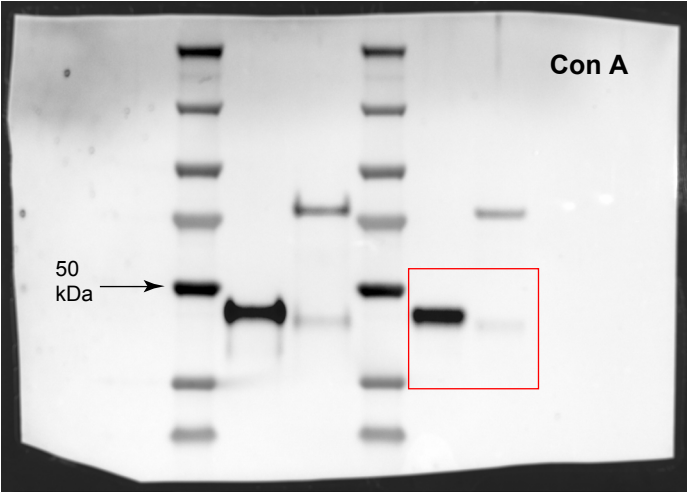

Supplement: NIHMS1841509-supplement-Supplementary_Figure_1.pdf [file NIHMS1841509-supplement-Supplementary_Figure_1.pdf]
